# Supplementary material for: Surface disordered rutile TiO2–graphene quantum dot hybrids: a new multifunctional material with superior photocatalytic and biofilm eradication properties
Source: Royal Society of Chemistry journal article supplement (doi:10.1039/c6nj03607d), 2017-01-01
Supplement: c6nj03607d1.pdf [file c6nj03607d1.pdf]

**Supporting Information**

**Surface disordered rutile TiO<sub>2</sub>-graphene quantum dots hybrid: A new multifunctional material with superior photocatalytic and biofilm eradication properties**

Anupam Biswas<sup>‡</sup>, Gayatri Salunke<sup>‡</sup>, Puneet Khandelwal<sup>††</sup>, Raja Das<sup>‡†</sup>, Pankaj Poddar<sup>‡†\*</sup>

*<sup>‡</sup>Physical & Materials Chemistry Division, CSIR-National Chemical Laboratory, Pune - 411008, India*

*<sup>†</sup>Academy of Scientific and Innovative Research, AnusandhanBhawan, Rafi Marg, New Delhi - 110001, India*

\*Corresponding author:

E-mail: [p.poddar@ncl.res.in](mailto:p.poddar@ncl.res.in)

Physical and Material Chemistry Division,

CSIR-National Chemical Laboratory,

Dr. Homi Bhabha Road

Pune- 411008, India

Phone: +91-20-2590-2580 (Office)

Fax: +91-20-2590-2636

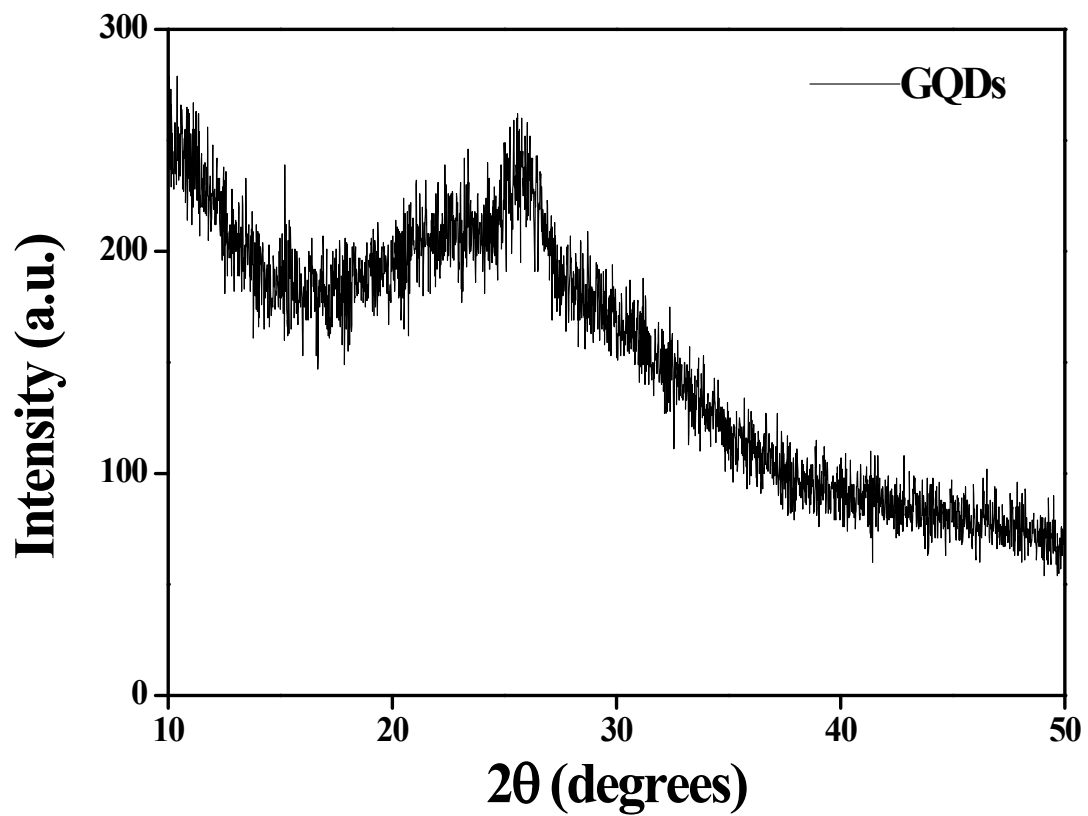

**Figure S1.** PXRD spectrum of GQDs showing the hump at  $2\theta \sim 25^\circ$  which is a characteristic feature of graphitic carbon.

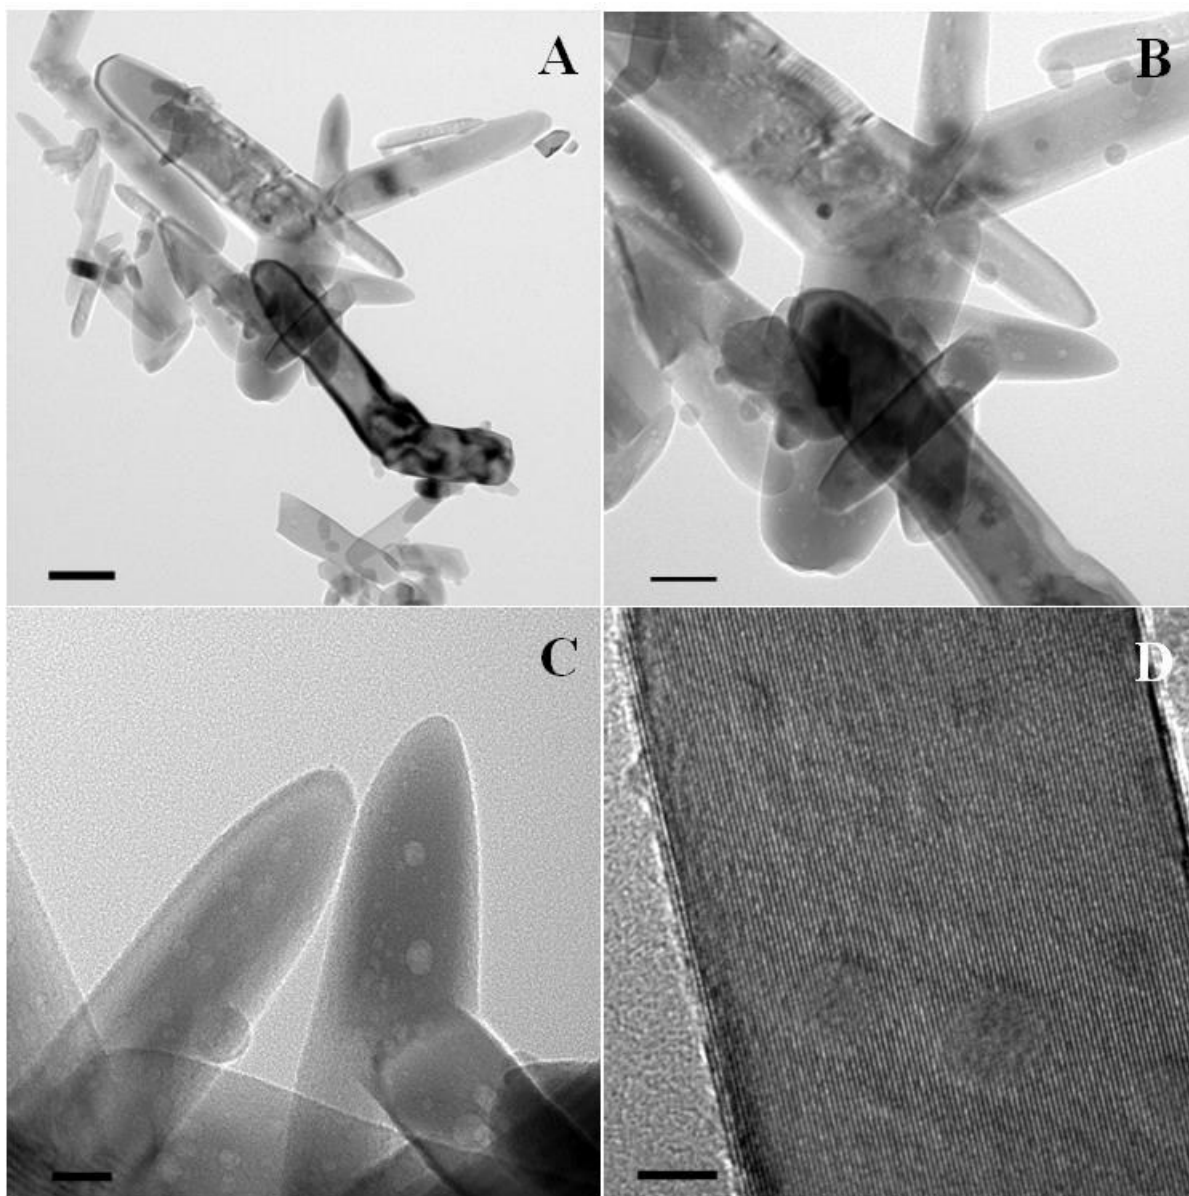

**Figure S2.** A, B, C) TEM images D) HR-TEM image of rutile-TiO<sub>2</sub> nanorods. Scale bars are 100, 50, 20, and 5 nm for A, B, C, and D, respectively.

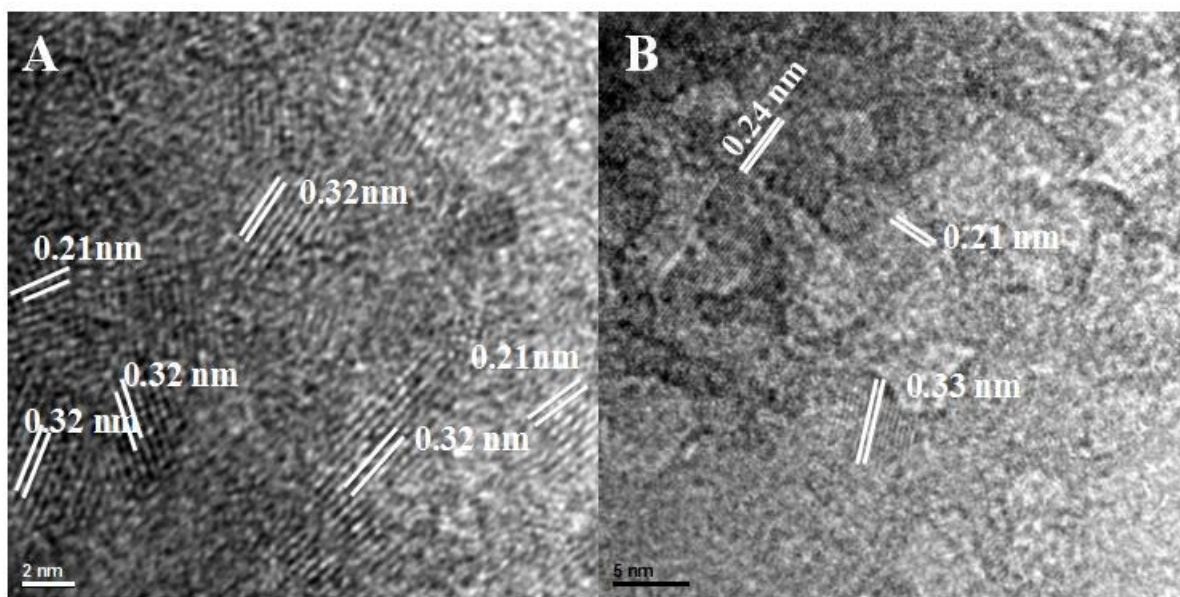

**Figure S3.** A, B) HR-TEM images show the distribution of rutile-TiO<sub>2</sub> and GQDs in TG-hybrid. Lattice spacings of 0.33 nm and 0.21 nm correspond to (111) and (100) planes of GQDs, respectively and lattice spacings of 0.32 nm and 0.24 nm correspond to rutile-TiO<sub>2</sub> (110) and (101) planes, respectively.

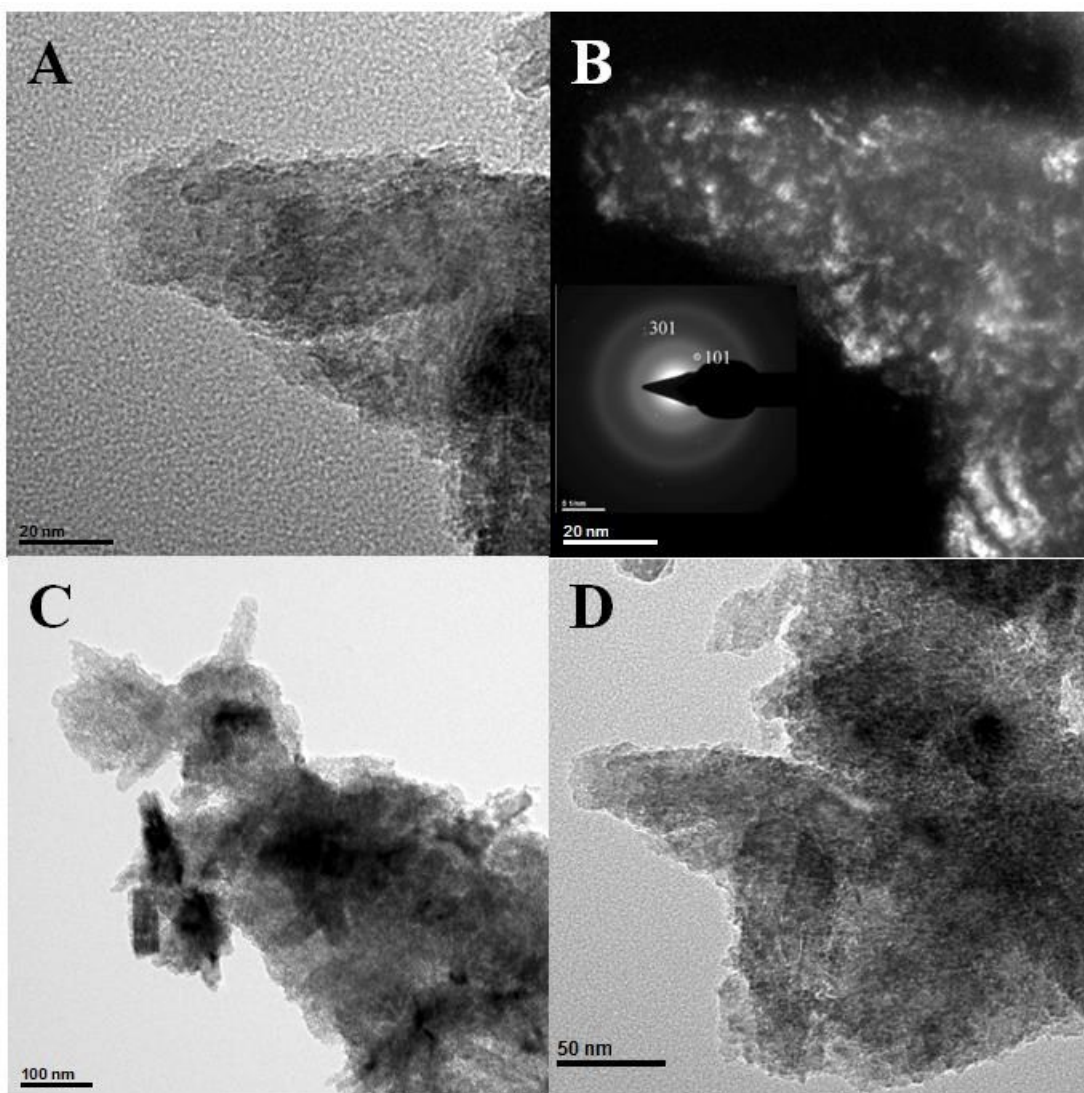

**Figure S4.** A, B) Comparison of bright-field and dark-field  $\{(101) \text{ diffracted beam of TiO}_2\}$  images of the same area of rutile-TG-hybrid. Inset of B) shows the corresponding SAED pattern. Images clearly display the uniform distribution of TiO<sub>2</sub> and GQDs. C, D) TEM images of TG-hybrid.

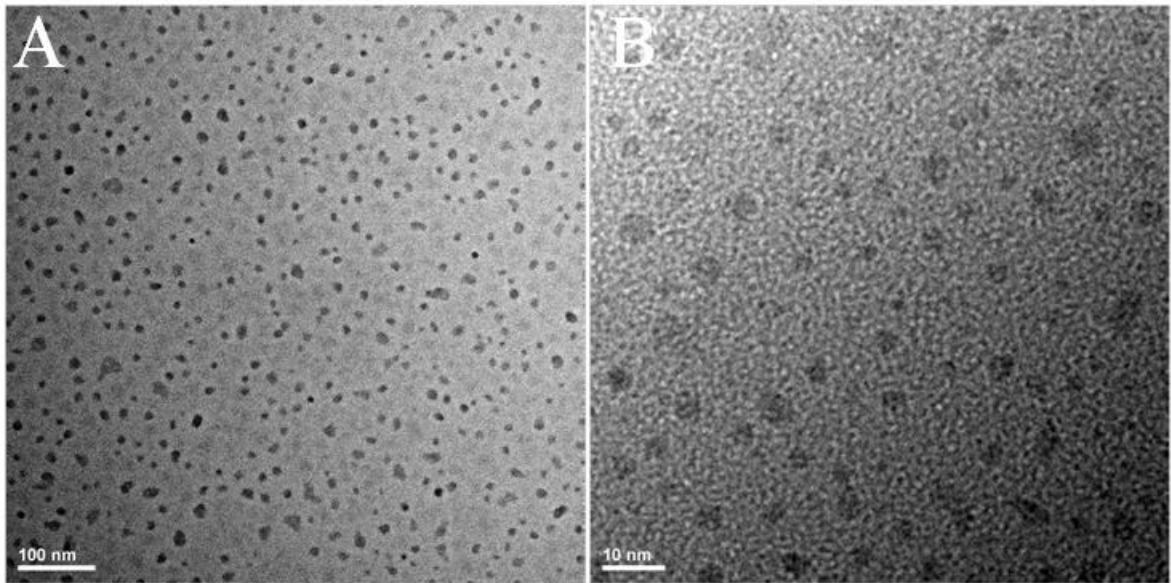

**Figure S5.** HR-TEM images at different magnifications showing uniform and well dispersed GQDs.

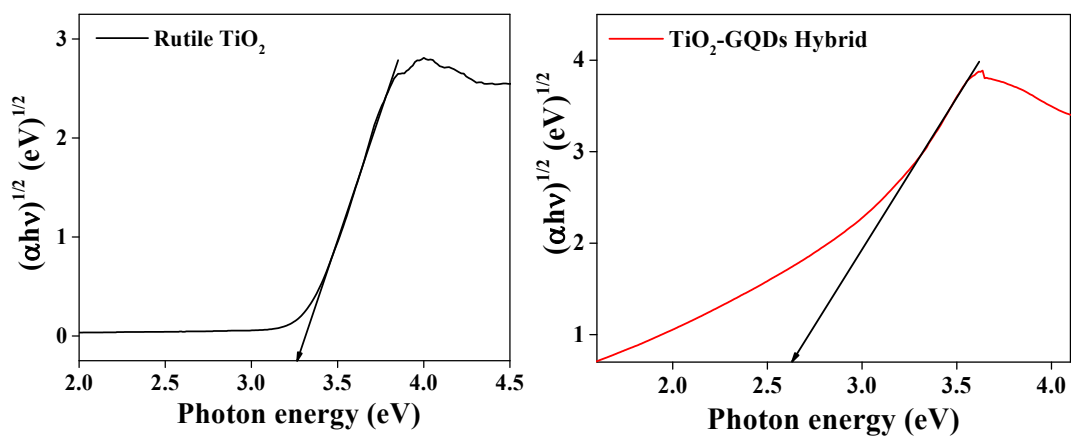

**Figure S6.** A Tauc plot of  $(\alpha h\nu)^{1/2}$  vs. photon energy for as-synthesized Rutile-TiO<sub>2</sub> and TG-hybrid.

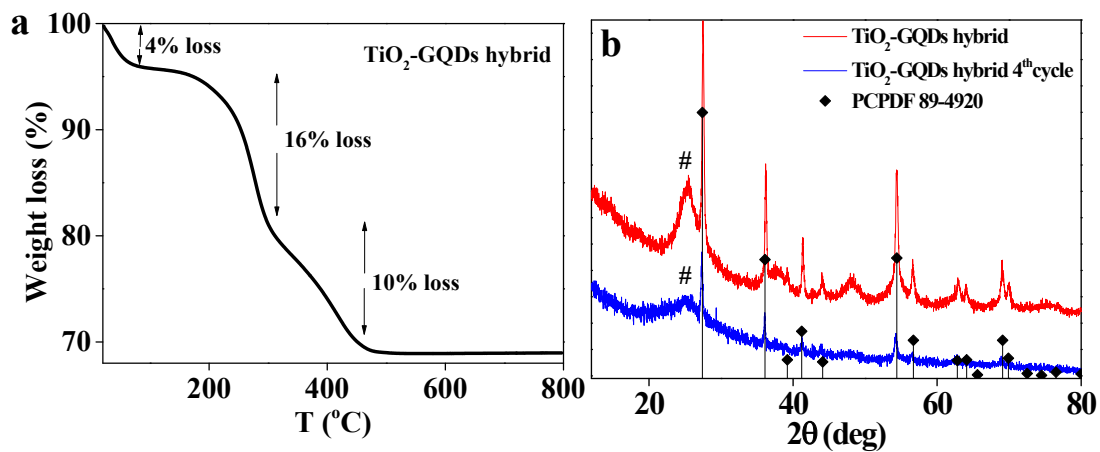

**Figure S7.** (a) TGA thermogram of surface-disordered TG-hybrid. (b) A comparison of room temperature XRD patterns of surface disordered TG-hybrid, TG-hybrid after 4<sup>th</sup> cycle and PCPDF#894920 data for rutile- $\text{TiO}_2$ . The # marked peaks represent graphitic carbon.



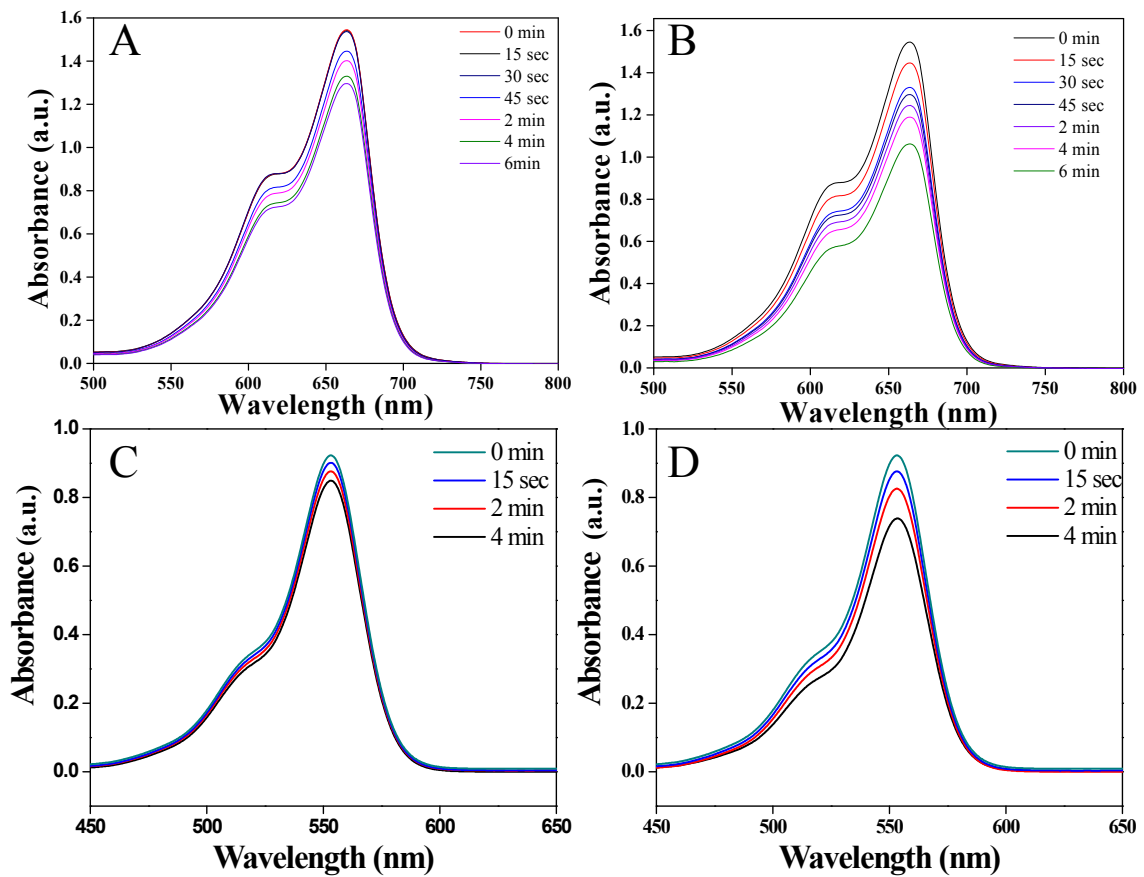

**Figure S8.** Photodegradation of methylene blue (MB,  $5 \times 10^{-5}$  M) and rhodamine B (RhB,  $10^{-5}$  M) for rutile-TiO<sub>2</sub> and GQDs in presence of natural sunlight after 1<sup>st</sup> cycle. (A) Photodegradation of MB by GQDs. (B) Photodegradation of MB by TiO<sub>2</sub>. (C) Photodegradation of RhB by GQDs. (D) Photodegradation of RhB by TiO<sub>2</sub>.

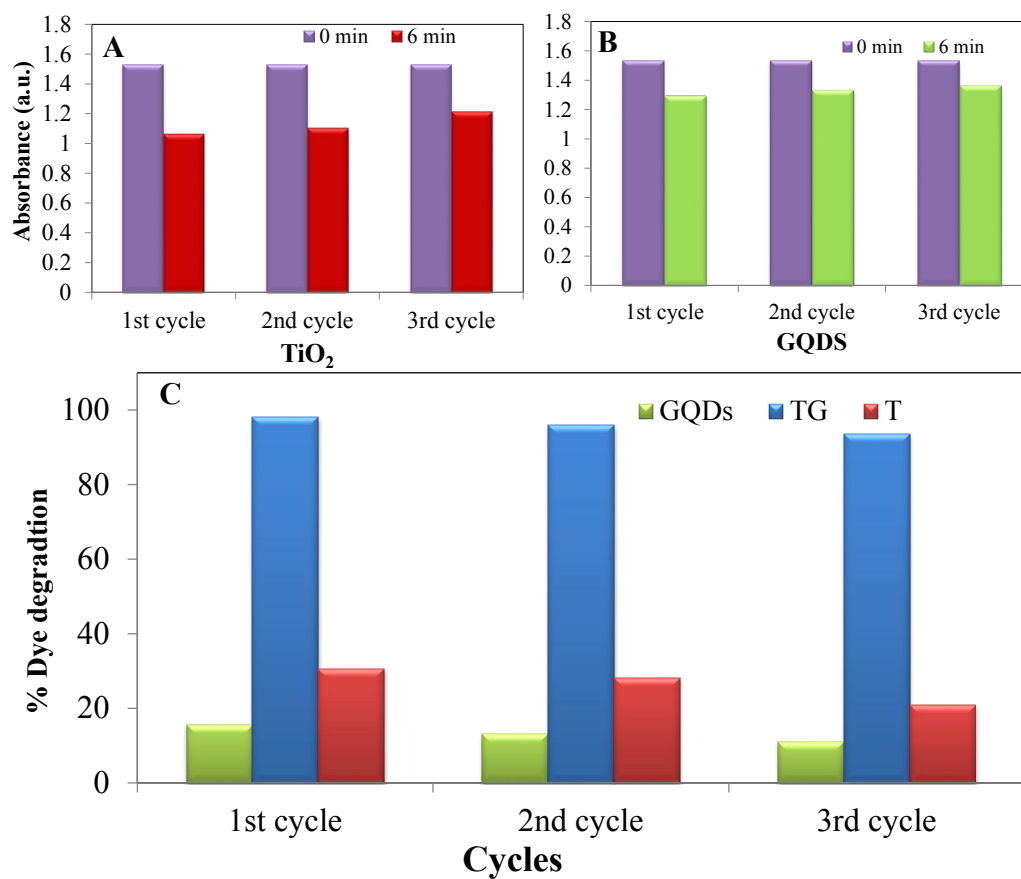

**Figure S9.** Comparative photodegradation of MB by GQDs, TiO<sub>2</sub> and TiO<sub>2</sub>-GQDs hybrid under natural sunlight A) MB dye degradation by GQDs measured after 6 min. B) MB dye degradation by TiO<sub>2</sub> measured after 6 min. C) Comparison of MB dye degradation by GQDs, TiO<sub>2</sub> (T) and TiO<sub>2</sub>-GQDs hybrid (TG).

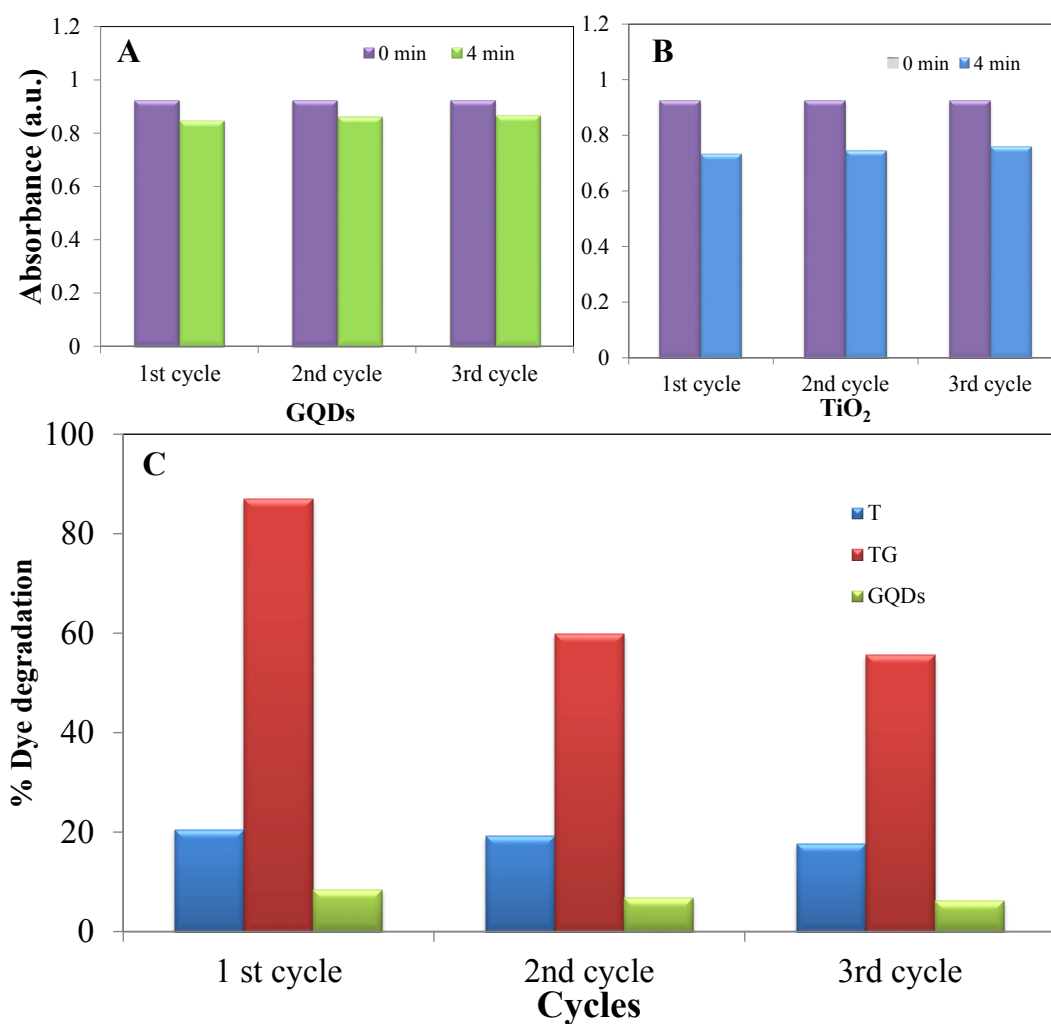

**Figure S10.** Comparative photodegradation of RhB by GQDs, TiO<sub>2</sub> and TiO<sub>2</sub>-GQDs hybrid under natural sunlight A) RhB dye degradation by GQDs after 4 min. B) RhB dye degradation by TiO<sub>2</sub> after 4 min. C) Comparison of RhB dye degradation by GQDs, TiO<sub>2</sub> (T) and TG-hybrid (TG).

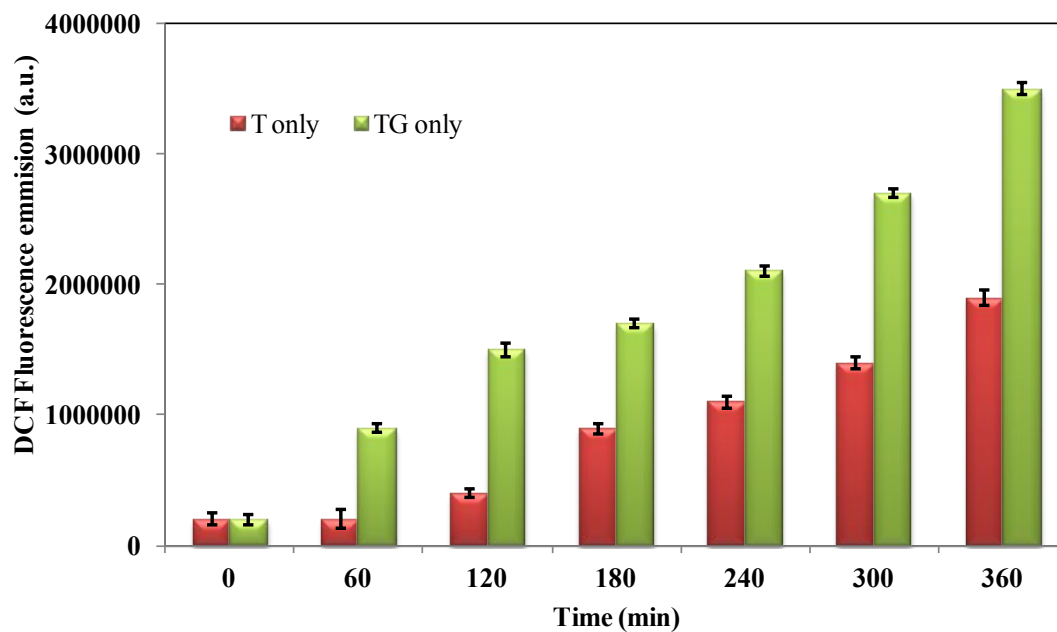

**Figure S11.** Measurement of ROS production using DCF fluorescence ( $\lambda_{em}= 523$  nm) in presence of only rutile TiO<sub>2</sub> and TG-hybrid illuminated with sunlight for 360 min.

Abbreviations: T: rutile TiO<sub>2</sub>; TG: TiO<sub>2</sub>-GQDs hybrid.

**Table S1:** Comparison of photo degradation for methylene blue.

| Author              | Article                                                                                                        | Time taken for degradation of methylene blue (MB) |
|---------------------|----------------------------------------------------------------------------------------------------------------|---------------------------------------------------|
| Chen <i>et. al.</i> | <i>Science</i> <b>2011</b> , 331, 746–750.(Ref:23)<br>Light condition: solar simulator of 1 Sun power.         | 8 minutes                                         |
| Pan <i>et. al.</i>  | <i>ACS Appl. Mater. Interfaces</i> <b>2012</b> , 4, 3944–3950.(Ref:49)<br>Light condition: natural solar light | 10 minutes                                        |
| Our TG-hybrid       | Light condition: natural solar light                                                                           | 6 minutes                                         |
